# Supplementary material for: Photoreceptor disc incisures form as an adaptive mechanism ensuring the completion of disc enclosure
Source: eLife. 2023 Jul 14;12:e89160. doi: 10.7554/eLife.89160 (PMC10361718; doi:10.7554/eLife.89160)
Supplement: Table 1—source data 1. [file elife-89160-table1-data1.xlsx]

## Sheet: WT 1
mROS WT sample 1, 1 pmol BSA
90 min grad, 3e6, IT-100 msec, Top15, direct inject short incl list
Progenesis: sens-5, RT=0.05, charge 2-3, mouse ROS database, carb -Cys, 0 uncuts
Peptide identifier	Ions used in quantitation	Ions	Deconvoluted peptide ions	Deconvoluted charges	Retention time (min)	Neutral mass	Best identification score	Sequence	Modifications	Accession	Description	Normalized abundance (run 1)	Normalized abundance (run 2)	Average normalized abundance	Relative abundance for exclusion	Amount (fmol)	Average amount (fmol)	Rhodopsin molar ratio
31.41_1312.7229n	0	2	#285,#1093	2,3	31.4143	1312.72	64.23	HLVDEPQNLIK	[11] Label:13C(6)15N(2) (K)	P02769	BSA	5.91131e+06	6.15827e+06	6.03479e+06
31.43_1304.7106n	2	2	#192,#769	2,3	31.431	1304.71	69.73	HLVDEPQNLIK		P02769	BSA	9.83841e+06	1.04156e+07	1.0127e+07		595.91	447.302
52.63_1488.7963n	0	2	#817,#18975	2,3	52.6326	1488.8	98.34	LGEYGFQNALIVR	[13] Label:13C(6)15N(4) (R)	P02769	BSA	2.00732e+06	1.99103e+06	1.99917e+06
52.63_1478.7895n	0	2	#387,#9708	2,3	52.6326	1478.79	98.3	LGEYGFQNALIVR		P02769	BSA	5.21634e+06	5.06886e+06	5.1426e+06		388.748
42.59_1170.6370n	0	1	#253	2	42.5949	1170.64	70.14	LVNELTEFAK	[10] Label:13C(6)15N(2) (K)	P02769	BSA	4.4363e+06	4.52072e+06	4.47851e+06
42.59_1162.6252n	1	1	#106	2	42.5949	1162.63	76.3	LVNELTEFAK		P02769	BSA	1.02586e+07	1.05311e+07	1.03949e+07		430.839
44.91_1021.6255n	0	1	#255	2	44.9124	1021.63	53.85	QTALVELLK	[9] Label:13C(6)15N(2) (K)	P02769	BSA	3.06347e+06	3.28125e+06	3.17236e+06
44.91_1013.6137n	1	1	#79	2	44.9124	1013.61	51.62	QTALVELLK		P02769	BSA	9.82228e+06	1.04887e+07	1.01555e+07		312.378
33.91_936.4945n	0	1	#242	2	33.9081	936.495	46.1	YLYEIAR	[7] Label:13C(6)15N(4) (R)	P02769	BSA	2.92049e+06	3.3285e+06	3.1245e+06
33.91_926.4877n	0	1	#120	2	33.9081	926.488	41.42	YLYEIAR		P02769	BSA	5.78819e+06	6.49767e+06	6.14293e+06		508.633
8.43_1497.7138n	2	2	#34,#353	2,3	8.42676	1497.71	88.17	EAAAQQQESATTQK	[14] Label:13C(6)15N(2) (K)	P15409	Rhodopsin	5.24914e+07	4.80432e+07	5.02673e+07
8.44_1489.7028n	2	2	#5,#86	2,3	8.43707	1489.7	106.96	EAAAQQQESATTQK		P15409	Rhodopsin	2.3098e+08	2.59585e+08	2.45283e+08		8730.55	10906.3	1
19.72_1368.6276n	0	1	#20	2	19.7238	1368.63	94.91	NPLGDDDASATASK	[14] Label:13C(6)15N(2) (K)	P15409	Rhodopsin	4.88174e+07	4.52925e+07	4.70549e+07
19.72_1360.6134n	0	1	#504	2	19.7238	1360.61	101.39	NPLGDDDASATASK		P15409	Rhodopsin	3.50342e+08	3.37758e+08	3.4405e+08		13082.1
37.44_848.4519n	0	1	#200	2	37.4414	848.452	41.78	AFLESFK	[7] Label:13C(6)15N(2) (K)	P15499	Peripherin-2	3.10887e+06	3.11448e+06	3.11167e+06	0.274974
37.48_840.4382n	1	1	#50	2	37.4751	840.438	42.98	AFLESFK		P15499	Peripherin-2	1.05102e+07	1.05416e+07	1.05259e+07	0.742196	1513.1
45.13_1245.6701n	0	2	#339,#17215	2,3	45.1287	1245.67	61.8	GSLESTLAYGLK	[12] Label:13C(6)15N(2) (K)	P15499	Peripherin-2	3.36636e+06	3.2061e+06	3.28623e+06	0.290399
45.15_1237.6567n	0	1	#1815	2	45.145	1237.66	68.28	GSLESTLAYGLK		P15499	Peripherin-2	609677	573673	591675	0.0417197	80.5352
36.33_1172.5631n	0	1	#951	2	36.3324	1172.56	75.79	ICYDALDPAK	[2] Carbamidomethyl (C)|[10] Label:13C(6)15N(2) (K)	P15499	Peripherin-2	1.26192e+06	1.23246e+06	1.24719e+06	0.110212
36.33_1164.5486n	0	1	#998	2	36.3324	1164.55	67.75	ICYDALDPAK	[2] Carbamidomethyl (C)	P15499	Peripherin-2	1.1165e+06	1.30225e+06	1.20938e+06	0.0852745	433.74	593.968	18.3618
21.53_853.4432n	0	1	#1654	2	21.5306	853.443	23.71	SVPETWK	[7] Label:13C(6)15N(2) (K)	P15499	Peripherin-2	927556	974273	950914	0.084031
21.60_845.4290n	0	1	#922	2	21.5962	845.429	30.28	SVPETWK		P15499	Peripherin-2	1.55521e+06	1.65147e+06	1.60334e+06	0.113053	754.197
29.53_866.4267n	0	1	#235	2	29.5278	866.427	53.85	YLDFSSK	[7] Label:13C(6)15N(2) (K)	P15499	Peripherin-2	2.67097e+06	2.7695e+06	2.72023e+06	0.240383
29.53_858.4127n	0	1	#1888	2	29.5278	858.413	46.73	YLDFSSK		P15499	Peripherin-2	250282	253360	251821	0.0177562	41.4082
13.22_782.3806n	1	1	#149	2	13.2178	782.381	33	DTEVPGR	[7] Label:13C(6)15N(4) (R)	P32958	ROM1	7.68184e+06	7.2627e+06	7.47227e+06	0.386476
13.23_772.3724n	0	1	#288	2	13.2299	772.372	31.81	DTEVPGR		P32958	ROM1	4.6466e+06	4.82793e+06	4.73727e+06	0.777461	283.58	254.558	42.8441
64.51_1402.6656n	0	1	#18205	2	64.5123	1402.67	67.23	DWFGVQWVSNR	[11] Label:13C(6)15N(4) (R)	P32958	ROM1	441523	360481	401002	0.0207404
64.53_1392.6573n	0	1	#34588	2	64.529	1392.66	48.14	DWFGVQWVSNR		P32958	ROM1	213214	191168	202191	0.0331828	225.536
34.12_1430.6566n	2	2	#168,#11719	2,3	34.1223	1430.66	87.35	YLDPSDQDVVDR	[12] Label:13C(6)15N(4) (R)	P32958	ROM1	1.09158e+07	1.20064e+07	1.14611e+07	0.592784
34.14_1420.6487n	0	1	#1302	2	34.1392	1420.65	91.78	YLDPSDQDVVDR		P32958	ROM1	1.10017e+06	1.20742e+06	1.15379e+06	0.189356	45.03

## Sheet: WT 2
mROS WT sample 2, 1 pmol BSA
90 min grad, 3e6, IT-100 msec, Top15, direct inject short incl list
Progenesis: sens-5, RT=0.05, charge 2-3, mouse ROS database, carb -Cys, 0 uncuts
Peptide identifier	Ions used in quantitation	Ions	Deconvoluted peptide ions	Deconvoluted charges	Retention time (min)	Neutral mass	Best identification score	Sequence	Modifications	Accession	Description	Normalized abundance (run 1)	Normalized abundance (run 2)	Average normalized abundance	Relative abundance for exclusion	Amount (fmol)	Average amount (fmol)	Rhodopsin molar ratio
33.07_1312.7226n	0	2	#454,#1398	2,3	33.0661	1312.72	67.22	HLVDEPQNLIK	[11] Label:13C(6)15N(2) (K)	P02769	BSA	2.30532e+06	2.36748e+06	2.3364e+06
33.07_1304.7094n	2	2	#90,#307	2,3	33.0661	1304.71	61.65	HLVDEPQNLIK		P02769	BSA	1.32774e+07	1.35983e+07	1.34378e+07		173.867	167.152
55.71_1488.7963n	0	2	#1535,#18430	2,3	55.7122	1488.8	112.68	LGEYGFQNALIVR	[13] Label:13C(6)15N(4) (R)	P02769	BSA	660768	548092	604430
55.73_1478.7883n	0	2	#332,#4399	2,3	55.7347	1478.79	98.09	LGEYGFQNALIVR		P02769	BSA	3.92574e+06	3.10261e+06	3.51417e+06		171.998
44.91_1170.6372n	0	1	#343	2	44.9097	1170.64	61.68	LVNELTEFAK	[10] Label:13C(6)15N(2) (K)	P02769	BSA	2.32338e+06	2.26394e+06	2.29366e+06
44.91_1162.6245n	0	1	#69	2	44.9097	1162.62	57.32	LVNELTEFAK		P02769	BSA	1.32429e+07	1.32087e+07	1.32258e+07		173.423
47.37_1021.6260n	0	1	#339	2	47.3706	1021.63	54.66	QTALVELLK	[9] Label:13C(6)15N(2) (K)	P02769	BSA	2.47482e+06	1.79476e+06	2.13479e+06
47.37_1013.6125n	1	1	#39	2	47.3706	1013.61	53.3	QTALVELLK		P02769	BSA	2.24893e+07	1.56823e+07	1.90858e+07		111.852
35.62_936.4948n	0	1	#225	2	35.6165	936.495	45.98	YLYEIAR	[7] Label:13C(6)15N(4) (R)	P02769	BSA	1.87051e+06	1.96356e+06	1.91704e+06
35.62_926.4871n	0	1	#45	2	35.6165	926.487	42.21	YLYEIAR		P02769	BSA	9.14949e+06	9.58825e+06	9.36887e+06		204.618
8.55_1497.7133n	2	2	#65,#360	2,3	8.54562	1497.71	97.64	EAAAQQQESATTQK	[14] Label:13C(6)15N(2) (K)	P15409	Rhodopsin	4.87699e+07	4.67415e+07	4.77557e+07
8.55_1489.7007n	2	2	#5,#60	2,3	8.5532	1489.7	92.45	EAAAQQQESATTQK		P15409	Rhodopsin	3.77865e+08	3.64642e+08	3.71254e+08		5197.75	6864.44	1
20.51_1368.6248n	1	1	#48	2	20.5112	1368.62	94.39	NPLGDDDASATASK	[14] Label:13C(6)15N(2) (K)	P15409	Rhodopsin	1.7703e+07	1.76047e+07	1.76538e+07
20.51_1360.6111n	0	1	#269	2	20.5112	1360.61	108.68	NPLGDDDASATASK		P15409	Rhodopsin	2.3877e+08	2.11742e+08	2.25256e+08		8531.13
39.40_848.4524n	0	1	#226	2	39.4019	848.452	40.86	AFLESFK	[7] Label:13C(6)15N(2) (K)	P15499	Peripherin-2	2.139e+06	2.20541e+06	2.1722e+06	0.365356
39.43_840.4383n	1	1	#34	2	39.4322	840.438	43.16	AFLESFK		P15499	Peripherin-2	7.03509e+06	7.23779e+06	7.13644e+06	0.502899	549.151	393.578	17.4411
47.72_1245.6690n	0	2	#666,#15927	2,3	47.72	1245.67	59.58	GSLESTLAYGLK	[12] Label:13C(6)15N(2) (K)	P15499	Peripherin-2	1.35049e+06	1.46294e+06	1.40671e+06	0.236604
47.72_1237.6551n	0	2	#1106,#20446	2,3	47.72	1237.66	68.18	GSLESTLAYGLK		P15499	Peripherin-2	2.06754e+06	1.89229e+06	1.97991e+06	0.139523	235.261
38.31_1172.5631n	0	1	#986	2	38.3078	1172.56	67.28	ICYDALDPAK	[2] Carbamidomethyl (C)|[10] Label:13C(6)15N(2) (K)	P15499	Peripherin-2	677530	655859	666695	0.112136
38.31_1164.5487n	0	1	#442	2	38.3078	1164.55	75.77	ICYDALDPAK	[2] Carbamidomethyl (C)	P15499	Peripherin-2	1.85879e+06	1.80252e+06	1.83065e+06	0.129005	458.976
22.55_853.4428n	0	1	#1719	2	22.5517	853.443	30.47	SVPETWK	[7] Label:13C(6)15N(2) (K)	P15499	Peripherin-2	535023	541609	538316	0.0905427
22.44_845.4286n	0	1	#419	2	22.4424	845.429	33	SVPETWK		P15499	Peripherin-2	1.67888e+06	1.41498e+06	1.54693e+06	0.109011	480.334
30.90_866.4267n	0	1	#377	2	30.9015	866.427	56.65	YLDFSSK	[7] Label:13C(6)15N(2) (K)	P15499	Peripherin-2	1.13957e+06	1.18345e+06	1.16151e+06	0.195361
30.94_858.4125n	0	1	#629	2	30.9409	858.412	51.11	YLDFSSK		P15499	Peripherin-2	1.67945e+06	1.71389e+06	1.69667e+06	0.119563	244.167
46.34_1383.6815n	0	1	#1206	2	46.3367	1383.68	73.52	ASLDAAQYPPWR	[12] Label:13C(6)15N(4) (R)	P32958	ROM1	2.69887e+06	2.40429e+06	2.55158e+06	0.164762
46.34_1373.6736n	0	1	#4122	2	46.3367	1373.67	79.2	ASLDAAQYPPWR		P32958	ROM1	1.8552e+06	1.51006e+06	1.68263e+06	0.0901311	110.228	165.17	41.5598
13.52_782.3796n	1	1	#171	2	13.523	782.38	30.56	DTEVPGR	[7] Label:13C(6)15N(4) (R)	P32958	ROM1	7.81312e+06	8.86097e+06	8.33705e+06	0.538343
13.52_772.3714n	1	1	#106	2	13.52	772.371	36.66	DTEVPGR		P32958	ROM1	1.26339e+07	1.40773e+07	1.33556e+07	0.715401	267.77
68.42_1402.6660n	0	1	#17870	2	68.4232	1402.67	69.07	DWFGVQWVSNR	[11] Label:13C(6)15N(4) (R)	P32958	ROM1	77069.4	91079.2	84074.3	0.00542888
68.42_1392.6576n	0	1	#5546	2	68.4232	1392.66	72.67	DWFGVQWVSNR		P32958	ROM1	429474	484757	457116	0.0244857	908.81
35.94_1430.6554n	0	2	#247	2	35.9404	1430.66	87.4	YLDPSDQDVVDR	[12] Label:13C(6)15N(4) (R)	P32958	ROM1	4.2889e+06	4.7387e+06	4.5138e+06	0.291467
35.92_1420.6476n	0	1	#364	2	35.9186	1420.65	87.16	YLDPSDQDVVDR		P32958	ROM1	3.06782e+06	3.27886e+06	3.17334e+06	0.169982	117.513

## Sheet: WT 3
mROS WT sample 3, 1 pmol BSA
90 min grad, 3e6, IT-100 msec, Top15, direct inject short incl list
Progenesis: sens-5, RT=0.05, charge 2-3, mouse ROS database, carb -Cys, 0 uncuts
Peptide identifier	Ions used in quantitation	Ions	Deconvoluted peptide ions	Deconvoluted charges	Retention time (min)	Neutral mass	Best identification score	Sequence	Modifications	Accession	Description	Normalized abundance (run 1)	Normalized abundance (run 2)	Average normalized abundance	Relative abundance for exclusion	Amount (fmol)	Average amount (fmol)	Rhodopsin molar ratio
32.86_1312.7228n	0	2	#631,#1429	2,3	32.8627	1312.72	67.23	HLVDEPQNLIK	[11] Label:13C(6)15N(2) (K)	P02769	BSA	2.78638e+06	2.86736e+06	2.82687e+06
32.86_1304.7093n	2	2	#163,#399	2,3	32.8627	1304.71	59.99	HLVDEPQNLIK		P02769	BSA	1.19175e+07	1.2454e+07	1.21857e+07		231.982	177.328
55.59_1488.7966n	0	2	#2304,#19901	2,3	55.5932	1488.8	97.86	LGEYGFQNALIVR	[13] Label:13C(6)15N(4) (R)	P02769	BSA	1.15924e+06	960963	1.0601e+06
55.61_1478.7885n	0	2	#324,#4376	2,3	55.614	1478.79	99.63	LGEYGFQNALIVR		P02769	BSA	9.49694e+06	7.48715e+06	8.49204e+06		124.835
44.88_1170.6373n	0	1	#470	2	44.8783	1170.64	70.22	LVNELTEFAK	[10] Label:13C(6)15N(2) (K)	P02769	BSA	2.90067e+06	2.72932e+06	2.815e+06
44.88_1162.6242n	1	1	#101	2	44.8783	1162.62	62.59	LVNELTEFAK		P02769	BSA	1.46576e+07	1.3936e+07	1.42968e+07		196.897
47.23_1021.6259n	0	1	#330	2	47.2323	1021.63	57.25	QTALVELLK	[9] Label:13C(6)15N(2) (K)	P02769	BSA	2.96101e+06	3.37335e+06	3.16718e+06
47.23_1013.6127n	1	1	#37	2	47.2323	1013.61	57.73	QTALVELLK		P02769	BSA	2.67159e+07	3.08875e+07	2.88017e+07		109.965
35.44_936.4947n	0	1	#361	2	35.4444	936.495	42.91	YLYEIAR	[7] Label:13C(6)15N(4) (R)	P02769	BSA	1.88748e+06	1.96734e+06	1.92741e+06
35.49_926.4869n	0	1	#87	2	35.4853	926.487	46.79	YLYEIAR		P02769	BSA	8.48084e+06	8.80833e+06	8.64459e+06		222.962
8.37_1497.7140n	2	2	#96,#472	2,3	8.37146	1497.71	84.19	EAAAQQQESATTQK	[14] Label:13C(6)15N(2) (K)	P15409	Rhodopsin	5.185e+07	5.5951e+07	5.39005e+07
8.37_1489.7015n	2	2	#7,#57	2,3	8.36785	1489.7	84.2	EAAAQQQESATTQK		P15409	Rhodopsin	5.90502e+08	6.30561e+08	6.10531e+08		8034.38	16167.1	1
20.41_1368.6248n	1	1	#76	2	20.4138	1368.62	99.7	NPLGDDDASATASK	[14] Label:13C(6)15N(2) (K)	P15409	Rhodopsin	1.71646e+07	1.82324e+07	1.76985e+07
20.41_1360.6111n	0	1	#894	2	20.4138	1360.61	101.82	NPLGDDDASATASK		P15409	Rhodopsin	6.21256e+08	5.91381e+08	6.06319e+08		24299.8
39.14_848.4523n	0	1	#318	2	39.1432	848.452	47.06	AFLESFK	[7] Label:13C(6)15N(2) (K)	P15499	Peripherin-2	2.10418e+06	2.07203e+06	2.0881e+06	0.34632
39.14_840.4379n	1	1	#33	2	39.1432	840.438	54.89	AFLESFK		P15499	Peripherin-2	1.24526e+07	1.29969e+07	1.27247e+07	0.608038	1080.62	865.639	18.6765
47.61_1245.6694n	0	2	#591	2	47.6094	1245.67	61.5	GSLESTLAYGLK	[12] Label:13C(6)15N(2) (K)	P15499	Peripherin-2	2.02605e+06	2.16464e+06	2.09535e+06	0.347521
47.63_1237.6552n	0	1	#2254	2	47.6312	1237.66	80.94	GSLESTLAYGLK		P15499	Peripherin-2	461988	523056	492522	0.0235347	41.6818
38.11_1172.5629n	0	1	#1810	2	38.1087	1172.56	50.76	ICYDALDPAK	[2] Carbamidomethyl (C)|[10] Label:13C(6)15N(2) (K)	P15499	Peripherin-2	735991	776008	756000	0.125385
38.15_1164.5480n	0	1	#788	2	38.1489	1164.55	75.68	ICYDALDPAK	[2] Carbamidomethyl (C)	P15499	Peripherin-2	2.02854e+06	1.9651e+06	1.99682e+06	0.0954159	468.375
22.29_853.4428n	0	1	#2510	2	22.29	853.443	32.6	SVPETWK	[7] Label:13C(6)15N(2) (K)	P15499	Peripherin-2	875887	895617	885752	0.146905
22.29_845.4286n	1	1	#262	2	22.29	845.429	41.8	SVPETWK		P15499	Peripherin-2	4.39576e+06	4.72714e+06	4.56145e+06	0.217964	913.204
30.70_858.4124n	0	1	#2634	2	30.7031	858.412	54.81	YLDFSSK		P15499	Peripherin-2	197071	211347	204209	0.0338689
30.70_866.4266n	0	1	#423	2	30.7031	866.427	51.19	YLDFSSK	[7] Label:13C(6)15N(2) (K)	P15499	Peripherin-2	1.13861e+06	1.16539e+06	1.152e+06	0.0550471	1000.35
46.26_1383.6812n	0	1	#3485	2	46.2597	1383.68	76.04	ASLDAAQYPPWR	[12] Label:13C(6)15N(4) (R)	P32958	ROM1	2.33864e+06	2.16542e+06	2.25203e+06
13.43_782.3794n	1	1	#223	2	13.4334	782.379	28.37	DTEVPGR	[7] Label:13C(6)15N(4) (R)	P32958	ROM1	7.00883e+06	6.65981e+06	6.83432e+06	0.570698
13.43_772.3711n	1	1	#138	2	13.4334	772.371	34.44	DTEVPGR		P32958	ROM1	1.31756e+07	1.26421e+07	1.29089e+07	0.901624	334.943	382.031	42.3188
68.42_1402.6680n	0	1	#18452	2	68.4248	1402.67	60.56	DWFGVQWVSNR	[11] Label:13C(6)15N(4) (R)	P32958	ROM1	52098.6	54611.6	53355.1	0.0044554
68.42_1392.6580n	0	1	#11523	2	68.4248	1392.66	65.84	DWFGVQWVSNR		P32958	ROM1	127437	130792	129115	0.00901804	429.118
35.89_1430.6554n	0	2	#338	2	35.8911	1430.66	87.25	YLDPSDQDVVDR	[12] Label:13C(6)15N(4) (R)	P32958	ROM1	4.80728e+06	5.36811e+06	5.08769e+06	0.424847
35.89_1420.6474n	0	1	#1289	2	35.8911	1420.65	88.43	YLDPSDQDVVDR		P32958	ROM1	1.23018e+06	1.32857e+06	1.27937e+06	0.0893582	44.5917

## Sheet: Rds Het 1
mROS Rds het sample 1, 1 pmol BSA
90 min grad, 3e6, IT-100 msec, Top15, direct inject short incl list
Progenesis: sens-5, RT=0.05, charge 2-3, mouse ROS database, carb -Cys, 0 uncuts
Peptide identifier	Ions used in quantitation	Ions	Deconvoluted peptide ions	Deconvoluted charges	Retention time (min)	Neutral mass	Best identification score	Sequence	Modifications	Accession	Description	Normalized abundance (run 1)	Normalized abundance (run 2)	Average normalized abundance	Relative abundance for exclusion	Amount (fmol)	Average amount (fmol)	Rhodopsin molar ratio
32.98_1312.7229n	0	2	#334,#795	2,3	32.9825	1312.72	66.26	HLVDEPQNLIK	[11] Label:13C(6)15N(2) (K)	P02769	BSA	2.27091e+06	2.1708e+06	2.22086e+06
33.01_1304.7096n	2	2	#101,#311	2,3	33.0053	1304.71	63.53	HLVDEPQNLIK		P02769	BSA	7.54992e+06	7.25981e+06	7.40487e+06		299.919	540.022
55.68_1488.7960n	0	2	#1956,#17027	2,3	55.6837	1488.8	98.36	LGEYGFQNALIVR	[13] Label:13C(6)15N(4) (R)	P02769	BSA	571396	349490	460443
55.72_1478.7882n	0	2	#2906,#20646	2,3	55.7174	1478.79	98.18	LGEYGFQNALIVR		P02769	BSA	412116	249006	330561		1392.91
44.89_1170.6375n	0	1	#221	2	44.8911	1170.64	65.4	LVNELTEFAK	[10] Label:13C(6)15N(2) (K)	P02769	BSA	2.28802e+06	2.1391e+06	2.21356e+06
44.89_1162.6245n	1	1	#65	2	44.8911	1162.62	56.12	LVNELTEFAK		P02769	BSA	6.70912e+06	6.34834e+06	6.52873e+06		339.049
47.28_1021.6260n	0	1	#183	2	47.2817	1021.63	50.65	QTALVELLK	[9] Label:13C(6)15N(2) (K)	P02769	BSA	1.89492e+06	1.89303e+06	1.89397e+06
47.32_1013.6126n	0	1	#59	2	47.3221	1013.61	54.55	QTALVELLK		P02769	BSA	5.33358e+06	5.30836e+06	5.32097e+06		355.945
35.51_936.4945n	0	1	#172	2	35.5099	936.495	40.31	YLYEIAR	[7] Label:13C(6)15N(4) (R)	P02769	BSA	1.70323e+06	1.80975e+06	1.75649e+06
35.51_926.4866n	1	1	#48	2	35.5099	926.487	39.88	YLYEIAR		P02769	BSA	5.51293e+06	5.73644e+06	5.62469e+06		312.283
8.47_1497.7139n	2	2	#39,#229	2,3	8.47408	1497.71	92.8	EAAAQQQESATTQK	[14] Label:13C(6)15N(2) (K)	P15409	Rhodopsin	2.93482e+07	1.91542e+07	2.42512e+07
8.47_1489.7008n	2	2	#8,#88	2,3	8.47408	1489.7	101.64	EAAAQQQESATTQK		P15409	Rhodopsin	7.34556e+07	8.79206e+07	8.06881e+07		7187	7151.03	1
20.47_1368.6247n	1	1	#38	2	20.4663	1368.62	90.91	NPLGDDDASATASK	[14] Label:13C(6)15N(2) (K)	P15409	Rhodopsin	2.1473e+07	2.12761e+07	2.13746e+07
20.47_1360.6112n	0	1	#292	2	20.4663	1360.61	103.78	NPLGDDDASATASK		P15409	Rhodopsin	6.78792e+07	7.29312e+07	7.04052e+07		7115.07
39.36_848.4522n	1	1	#124	2	39.3574	848.452	50.49	AFLESFK	[7] Label:13C(6)15N(2) (K)	P15499	Peripherin-2	1.93299e+06	1.79611e+06	1.86455e+06	0.365212
39.36_840.4377n	0	1	#225	2	39.3574	840.438	46.48	AFLESFK		P15499	Peripherin-2	1.18802e+06	1.15238e+06	1.1702e+06	0.633959	338.921	234.597	30.4822
47.69_1245.6695n	0	2	#349	2	47.6876	1245.67	63.28	GSLESTLAYGLK	[12] Label:13C(6)15N(2) (K)	P15499	Peripherin-2	1.44995e+06	1.40108e+06	1.42552e+06	0.279219
47.69_1237.6553n	0	1	#4241	2	47.6876	1237.66	67.41	GSLESTLAYGLK		P15499	Peripherin-2	111530	119892	115711	0.0626867	43.8343
38.20_1172.5629n	0	1	#764	2	38.2	1172.56	61.9	ICYDALDPAK	[2] Carbamidomethyl (C)|[10] Label:13C(6)15N(2) (K)	P15499	Peripherin-2	567877	579079	573478	0.112328
38.25_1164.5485n	0	1	#2466	2	38.2476	1164.55	63.32	ICYDALDPAK	[2] Carbamidomethyl (C)	P15499	Peripherin-2	239125	239839	239482	0.12974	225.511
22.46_853.4429n	0	1	#1458	2	22.4552	853.443	31.16	SVPETWK	[7] Label:13C(6)15N(2) (K)	P15499	Peripherin-2	389134	387811	388472
30.75_866.4266n	0	1	#220	2	30.7511	866.427	46.86	YLDFSSK	[7] Label:13C(6)15N(2) (K)	P15499	Peripherin-2	1.2044e+06	1.27928e+06	1.24184e+06	0.243241
30.80_858.4124n	0	1	#744	2	30.7953	858.412	46.74	YLDFSSK		P15499	Peripherin-2	322529	318408	320469	0.173614	139.358
13.45_782.3795n	1	1	#103	2	13.4471	782.38	28.83	DTEVPGR	[7] Label:13C(6)15N(4) (R)	P32958	ROM1	8.77422e+06	7.2773e+06	8.02576e+06	0.646198
13.48_772.3712n	1	1	#197	2	13.4816	772.371	30.43	DTEVPGR		P32958	ROM1	5.22193e+06	4.28479e+06	4.75336e+06	0.748421	319.835	258.099	27.7066
35.86_1430.6557n	2	2	#167	2	35.8598	1430.66	94.9	YLDPSDQDVVDR	[12] Label:13C(6)15N(4) (R)	P32958	ROM1	4.33533e+06	4.4531e+06	4.39421e+06	0.353802
35.86_1420.6477n	0	1	#414	2	35.8598	1420.65	76.65	YLDPSDQDVVDR		P32958	ROM1	1.55711e+06	1.63853e+06	1.59782e+06	0.251579	196.363

## Sheet: Rds Het 2
mROS Rds het sample 2, 1 pmol BSA
90 min grad, 3e6, IT-100 msec, Top15, direct inject short incl list
Progenesis: sens-5, RT=0.05, charge 2-3, mouse ROS database, carb -Cys, 0 uncuts
Peptide identifier	Ions used in quantitation	Ions	Deconvoluted peptide ions	Deconvoluted charges	Retention time (min)	Neutral mass	Best identification score	Sequence	Modifications	Accession	Description	Normalized abundance (run 1)	Normalized abundance (run 2)	Average normalized abundance	Relative abundance for exclusion	Amount (fmol)	Average amount (fmol)	Rhodopsin molar ratio
32.86_1312.7219n	0	2	#387,#1257	2,3	32.8623	1312.72	73.31	HLVDEPQNLIK	[11] Label:13C(6)15N(2) (K)	P02769	BSA	4.20117e+06	4.24328e+06	4.22222e+06
32.86_1304.7091n	2	2	#55,#174	2,3	32.8623	1304.71	63.84	HLVDEPQNLIK		P02769	BSA	2.62523e+07	2.5841e+07	2.60467e+07		162.102	220.106
55.57_1488.7962n	0	2	#2108,#21907	2,3	55.5741	1488.8	112.82	LGEYGFQNALIVR	[13] Label:13C(6)15N(4) (R)	P02769	BSA	407805	416484	412145
55.60_1478.7884n	0	2	#1182,#18606	2,3	55.5973	1478.79	98.26	LGEYGFQNALIVR		P02769	BSA	1.07648e+06	887617	982047		419.679
44.74_1170.6377n	0	1	#241	2	44.7392	1170.64	55.28	LVNELTEFAK	[10] Label:13C(6)15N(2) (K)	P02769	BSA	3.06957e+06	3.05059e+06	3.06008e+06
44.74_1162.6253n	1	1	#42	2	44.7392	1162.63	57.24	LVNELTEFAK		P02769	BSA	1.78533e+07	1.76278e+07	1.77405e+07		172.491
47.12_1021.6258n	0	1	#226	2	47.1178	1021.63	50.44	QTALVELLK	[9] Label:13C(6)15N(2) (K)	P02769	BSA	2.20288e+06	2.262e+06	2.23244e+06
47.12_1013.6133n	0	1	#38	2	47.1178	1013.61	50.31	QTALVELLK		P02769	BSA	1.28356e+07	1.32414e+07	1.30385e+07		171.219
35.38_936.4954n	0	1	#231	2	35.3781	936.495	45.3	YLYEIAR	[7] Label:13C(6)15N(4) (R)	P02769	BSA	2.39092e+06	2.38032e+06	2.38562e+06
35.42_926.4878n	1	1	#36	2	35.4171	926.488	47.04	YLYEIAR		P02769	BSA	1.37213e+07	1.35371e+07	1.36292e+07		175.038
8.47_1497.7147n	2	2	#61,#355	2,3	8.47368	1497.71	92.88	EAAAQQQESATTQK	[14] Label:13C(6)15N(2) (K)	P15409	Rhodopsin	2.58209e+07	3.91441e+07	3.24825e+07
8.47_1489.7017n	2	2	#25,#129	2,3	8.47368	1489.7	106.93	EAAAQQQESATTQK		P15409	Rhodopsin	7.09231e+07	1.04165e+08	8.75442e+07		2372.84	2764.71	1
20.36_1368.6253n	1	1	#35	2	20.3644	1368.63	89.66	NPLGDDDASATASK	[14] Label:13C(6)15N(2) (K)	P15409	Rhodopsin	2.36955e+07	2.3732e+07	2.37137e+07
20.36_1360.6116n	0	1	#313	2	20.3644	1360.61	108.62	NPLGDDDASATASK		P15409	Rhodopsin	8.30298e+07	8.70115e+07	8.50207e+07		3156.57
39.17_848.4522n	1	1	#191	2	39.1658	848.452	41.07	AFLESFK	[7] Label:13C(6)15N(2) (K)	P15499	Peripherin-2	2.46795e+06	2.42984e+06	2.4489e+06	0.328529
39.21_840.4376n	0	1	#225	2	39.2068	840.438	46.17	AFLESFK		P15499	Peripherin-2	1.32552e+06	1.2486e+06	1.28706e+06	0.458268	115.68	110.168	25.0954
47.52_1245.6696n	0	2	#366	2	47.5197	1245.67	61.58	GSLESTLAYGLK	[12] Label:13C(6)15N(2) (K)	P15499	Peripherin-2	2.12129e+06	1.96351e+06	2.0424e+06	0.273996
47.52_1237.6550n	0	1	#4880	2	47.5197	1237.65	45.55	GSLESTLAYGLK		P15499	Peripherin-2	158510	145378	151944	0.0541008	16.3747
38.12_1172.5631n	0	1	#1133	2	38.1153	1172.56	74.15	ICYDALDPAK	[2] Carbamidomethyl (C)|[10] Label:13C(6)15N(2) (K)	P15499	Peripherin-2	836915	806592	821754	0.110241
38.12_1164.5486n	0	1	#2283	2	38.1153	1164.55	71.79	ICYDALDPAK	[2] Carbamidomethyl (C)	P15499	Peripherin-2	387673	412842	400258	0.142515	107.209
22.21_853.4430n	0	1	#2089	2	22.207	853.443	33.85	SVPETWK	[7] Label:13C(6)15N(2) (K)	P15499	Peripherin-2	759008	772457	765732	0.102726
22.28_845.4281n	0	1	#1429	2	22.284	845.428	32.28	SVPETWK		P15499	Peripherin-2	483511	500175	491843	0.175125	141.378
30.64_866.4266n	0	1	#259	2	30.636	866.427	41.32	YLDFSSK	[7] Label:13C(6)15N(2) (K)	P15499	Peripherin-2	1.40254e+06	1.34817e+06	1.37535e+06	0.184508
30.68_858.4124n	0	1	#1015	2	30.6811	858.412	36.47	YLDFSSK		P15499	Peripherin-2	472939	481915	477427	0.169992	76.4055
46.21_1383.6812n	0	1	#4147	2	46.207	1383.68	72.35	ASLDAAQYPPWR	[12] Label:13C(6)15N(4) (R)	P32958	ROM1	1.42126e+06	1.40395e+06	1.41261e+06	0.0852614
46.03_1373.6729n	0	1	#12411	2	46.0256	1373.67	57.32	ASLDAAQYPPWR		P32958	ROM1	318412	310976	314694	0.0385017	49.0342	91.6973	30.1504
13.41_782.3796n	1	1	#147	2	13.4063	782.38	31.99	DTEVPGR	[7] Label:13C(6)15N(4) (R)	P32958	ROM1	9.95891e+06	9.51159e+06	9.73525e+06	0.587596
13.41_772.3712n	1	1	#228	2	13.4063	772.371	34.16	DTEVPGR		P32958	ROM1	5.09342e+06	5.24914e+06	5.17128e+06	0.632687	116.918
35.85_1430.6557n	2	2	#240	2	35.8467	1430.66	76.2	YLDPSDQDVVDR	[12] Label:13C(6)15N(4) (R)	P32958	ROM1	5.49309e+06	5.34707e+06	5.42008e+06	0.327143
35.85_1420.6479n	0	1	#506	2	35.8467	1420.65	87.22	YLDPSDQDVVDR		P32958	ROM1	2.59005e+06	2.78505e+06	2.68755e+06	0.328812	109.139

## Sheet: Rds Het 3
mROS Rds het sample 3, 1 pmol BSA
90 min grad, 3e6, IT-100 msec, Top15, direct inject short incl list
Progenesis: sens-5, RT=0.05, charge 2-3, mouse ROS database, carb -Cys, 0 uncuts
Peptide identifier	Ions used in quantitation	Ions	Deconvoluted peptide ions	Deconvoluted charges	Retention time (min)	Neutral mass	Best identification score	Sequence	Modifications	Accession	Description	Normalized abundance (run 1)	Normalized abundance (run 2)	Average normalized abundance	Relative abundance for exclusion	Amount (fmol)	Average amount (fmol)	Rhodopsin molar ratio
36.53_1312.7227n	0	2	#354,#1011	2,3	36.5341	1312.72	59.1	HLVDEPQNLIK	[11] Label:13C(6)15N(2) (K)	P02769	BSA	4.56751e+06	4.16392e+06	4.36571e+06
36.53_1304.7097n	2	2	#141,#616	2,3	36.5341	1304.71	57.33	HLVDEPQNLIK		P02769	BSA	9.69849e+06	8.90071e+06	9.2996e+06		938.903	903.32
59.62_1488.7976n	0	2	#713,#7464	2,3	59.6176	1488.8	95.82	LGEYGFQNALIVR	[13] Label:13C(6)15N(4) (R)	P02769	BSA	3.00176e+06	2.77171e+06	2.88674e+06
59.65_1478.7893n	0	2	#867,#8682	2,3	59.653	1478.79	92.21	LGEYGFQNALIVR		P02769	BSA	4.74755e+06	4.53123e+06	4.63939e+06		1244.45
48.81_1170.6372n	0	1	#263	2	48.8143	1170.64	70.07	LVNELTEFAK	[10] Label:13C(6)15N(2) (K)	P02769	BSA	4.40092e+06	4.13382e+06	4.26737e+06
48.81_1162.6255n	1	1	#46	2	48.8143	1162.63	70.12	LVNELTEFAK		P02769	BSA	1.81059e+07	1.68314e+07	1.74687e+07		488.575
52.45_1021.6265n	0	1	#460	2	52.4508	1021.63	56.24	QTALVELLK	[9] Label:13C(6)15N(2) (K)	P02769	BSA	2.21815e+06	2.00902e+06	2.11359e+06
52.45_1013.6129n	0	1	#209	2	52.4508	1013.61	55.8	QTALVELLK		P02769	BSA	4.76255e+06	4.32023e+06	4.54139e+06		930.811
38.86_936.4950n	0	1	#729	2	38.8611	936.495	37.46	YLYEIAR	[7] Label:13C(6)15N(4) (R)	P02769	BSA	1.44242e+06	1.2576e+06	1.35001e+06
38.86_926.4866n	0	1	#306	2	38.8611	926.487	35.49	YLYEIAR		P02769	BSA	3.14517e+06	2.76386e+06	2.95451e+06		913.865
10.66_1497.7164n	2	2	#58,#332	2,3	10.6623	1497.72	101.95	EAAAQQQESATTQK	[14] Label:13C(6)15N(2) (K)	P15409	Rhodopsin	2.21127e+07	3.89573e+07	3.0535e+07
10.70_1489.7027n	0	2	#315,#1459	2,3	10.6963	1489.7	82.36	EAAAQQQESATTQK		P15409	Rhodopsin	2.60728e+07	2.89577e+07	2.75152e+07		3255.94	3007.85	1
22.55_1368.6264n	1	1	#40	2	22.5545	1368.63	86.67	NPLGDDDASATASK	[14] Label:13C(6)15N(2) (K)	P15409	Rhodopsin	2.68562e+07	2.19654e+07	2.44108e+07
22.55_1360.6120n	0	1	#1659	2	22.5545	1360.61	87.09	NPLGDDDASATASK		P15409	Rhodopsin	1.92012e+07	1.80878e+07	1.86445e+07		2759.75
43.31_848.4526n	1	1	#677	2	43.3133	848.453	54.37	AFLESFK	[7] Label:13C(6)15N(2) (K)	P15499	Peripherin-2	983791	818534	901163	0.14157
43.35_840.4384n	0	1	#6614	2	43.3462	840.438	47.79	AFLESFK		P15499	Peripherin-2	92652.2	76811	84731.6	0.158968	84.9344	81.0721	37.1009
7.45_760.3353n	0	1	#6236	2	7.45198	760.335	20.51	DTDTPGR		P15499	Peripherin-2	440307	475164	457736
51.99_1245.6696n	2	2	#403,#6923	2,3	51.9859	1245.67	54.89	GSLESTLAYGLK	[12] Label:13C(6)15N(2) (K)	P15499	Peripherin-2	3.99662e+06	3.819e+06	3.90781e+06	0.613904
52.02_1237.6574n	0	1	#11850	2	52.0179	1237.66	25.64	GSLESTLAYGLK		P15499	Peripherin-2	310380	273104	291742	0.547349	67.4383
34.05_868.4197n	0	1	#497	2	34.048	868.42	40.62	YLDFSSK	[7] Label:13C(6)15N(2) (K)	P15499	Peripherin-2	1.51298e+06	1.60009e+06	1.55654e+06	0.244526
34.05_858.4129n	0	1	#5555	2	34.0475	858.413	42.12	YLDFSSK		P15499	Peripherin-2	112978	200093	156535	0.293682	90.8437
14.95_782.3797n	1	1	#329	2	14.9528	782.38	23.78	DTEVPGR	[7] Label:13C(6)15N(4) (R)	P32958	ROM1	1.74222e+06	2.40851e+06	2.07536e+06	0.206882
14.95_772.3718n	0	1	#1900	2	14.9528	772.372	30.69	DTEVPGR		P32958	ROM1	328993	258694	293843	0.334068	127.898	94.7457	31.7465
70.98_1402.6666n	0	1	#18885	2	70.9805	1402.67	69.64	DWFGVQWVSNR	[11] Label:13C(6)15N(4) (R)	P32958	ROM1	101781	62613.1	82197	0.00819377
70.98_1392.6585n	0	1	#65534	2	71.0105	1392.66	31.12	DWFGVQWVSNR		P32958	ROM1	7780.89	8613.07	8196.98	0.00931909	90.0823
37.55_1430.6559n	2	2	#180,#5051	2,3	37.5498	1430.66	86.7	YLDPSDQDVVDR	[12] Label:13C(6)15N(4) (R)	P32958	ROM1	8.30937e+06	7.4388e+06	7.87408e+06	0.784924
37.55_1420.6469n	0	1	#9220	2	37.5498	1420.65	59.09	YLDPSDQDVVDR		P32958	ROM1	620196	534904	577550	0.656613	66.2569
86.48_2959.5105n	1	1	#8460	3	86.4756	2959.51	45.73	YLQTALEGLGGVIDGEGEAQGYLFPGGLK	[29] Label:13C(6)15N(2) (K)	P32958	ROM1	2.12874e+06	1.58703e+06	1.85789e+06

## Sheet: Rho Het 1
mROS Rho het sample 1, 1 pmol BSA
90 min grad, 3e6, IT-100 msec, Top15, direct inject short incl list
Progenesis: sens-5, RT=0.05, charge 2-3, mouse ROS database, carb -Cys, 0 uncuts
Peptide identifier	Ions used in quantitation	Ions	Deconvoluted peptide ions	Deconvoluted charges	Retention time (min)	Neutral mass	Best identification score	Sequence	Modifications	Accession	Description	Normalized abundance (run 1)	Normalized abundance (run 2)	Average normalized abundance	Relative abundance for exclusion	Amount (fmol)	Average amount (fmol)	Rhodopsin molar ratio
31.43_1312.7224n	0	2	#240,#827	2,3	31.4277	1312.72	60.86	HLVDEPQNLIK	[11] Label:13C(6)15N(2) (K)	P02769	BSA	4.00128e+06	3.86957e+06	3.93543e+06
31.43_1304.7116n	2	2	#110,#414	2,3	31.4277	1304.71	65.56	HLVDEPQNLIK		P02769	BSA	9.58552e+06	9.17726e+06	9.38139e+06		419.493	722.757
52.58_1488.7966n	0	1	#1735	2	52.5797	1488.8	98.22	LGEYGFQNALIVR	[13] Label:13C(6)15N(4) (R)	P02769	BSA	3.85466e+06	2.17204e+06	3.01335e+06
52.59_1478.7885n	0	2	#2441,#28979	2,3	52.5921	1478.79	98.54	LGEYGFQNALIVR		P02769	BSA	2.99017e+06	1.66646e+06	2.32831e+06		1294.22
42.55_1170.6372n	0	1	#209	2	42.5544	1170.64	61.06	LVNELTEFAK	[10] Label:13C(6)15N(2) (K)	P02769	BSA	4.27632e+06	3.47508e+06	3.8757e+06
42.59_1162.6260n	1	1	#125	2	42.5866	1162.63	57.26	LVNELTEFAK		P02769	BSA	7.10333e+06	5.78779e+06	6.44556e+06		601.298
44.84_1021.6260n	0	1	#211	2	44.8374	1021.63	51.4	QTALVELLK	[9] Label:13C(6)15N(2) (K)	P02769	BSA	3.44208e+06	5.58244e+06	4.51226e+06
44.86_1013.6137n	1	1	#182	2	44.8555	1013.61	53.63	QTALVELLK		P02769	BSA	4.39036e+06	7.29613e+06	5.84324e+06		772.219
33.84_936.4945n	0	1	#157	2	33.844	936.494	50	YLYEIAR	[7] Label:13C(6)15N(4) (R)	P02769	BSA	2.72174e+06	2.70591e+06	2.71383e+06
33.88_926.4879n	0	1	#78	2	33.8788	926.488	53.5	YLYEIAR		P02769	BSA	5.18763e+06	5.12022e+06	5.15393e+06		526.555
8.53_1497.7149n	2	2	#38353,#175	2,3	8.52695	1497.71	92.58	EAAAQQQESATTQK	[14] Label:13C(6)15N(2) (K)	P15409	Rhodopsin	2.85959e+07	3.6791e+07	3.26935e+07
8.53_1489.7027n	2	2	#38354,#208	2,3	8.52695	1489.7	97.7	EAAAQQQESATTQK		P15409	Rhodopsin	2.57601e+07	3.32192e+07	2.94896e+07		2607.72	3154.02	1
19.70_1368.6281n	1	1	#10	2	19.6968	1368.63	97.34	NPLGDDDASATASK	[14] Label:13C(6)15N(2) (K)	P15409	Rhodopsin	4.00644e+07	3.91743e+07	3.96194e+07
19.70_1360.6136n	0	1	#322	2	19.6968	1360.61	94.2	NPLGDDDASATASK		P15409	Rhodopsin	4.92186e+07	5.22016e+07	5.07101e+07		3700.32
37.43_848.4523n	0	1	#114	2	37.4335	848.452	39.01	AFLESFK	[7] Label:13C(6)15N(2) (K)	P15499	Peripherin-2	3.30842e+06	3.12979e+06	3.2191e+06	0.429561
37.47_840.4388n	1	1	#86	2	37.4688	840.439	46.78	AFLESFK		P15499	Peripherin-2	3.06664e+06	3.139e+06	3.10282e+06	0.616249	696.649	468.774	6.72824
6.03_760.3356n	1	1	#153	2	6.03483	760.336	33.17	DTDTPGR		P15499	Peripherin-2	5.96389e+06	6.83547e+06	6.39968e+06
45.15_1245.6709n	0	1	#308	2	45.1489	1245.67	61.83	GSLESTLAYGLK	[12] Label:13C(6)15N(2) (K)	P15499	Peripherin-2	3.30364e+06	3.04665e+06	3.17514e+06
36.28_1172.5631n	0	1	#627	2	36.2821	1172.56	69.69	ICYDALDPAK	[2] Carbamidomethyl (C)|[10] Label:13C(6)15N(2) (K)	P15499	Peripherin-2	1.12916e+06	1.06038e+06	1.09477e+06	0.146087
36.32_1164.5489n	0	1	#702	2	36.3166	1164.55	69.75	ICYDALDPAK	[2] Carbamidomethyl (C)	P15499	Peripherin-2	802868	720796	761832	0.151307	502.955
21.56_853.4434n	0	1	#1742	2	21.556	853.443	29.72	SVPETWK	[7] Label:13C(6)15N(2) (K)	P15499	Peripherin-2	447035	458894	452964	0.0604441
21.59_845.4293n	0	1	#1271	2	21.59	845.429	35.99	SVPETWK		P15499	Peripherin-2	286550	262550	274550	0.0545281	438.076
29.56_866.4271n	0	1	#145	2	29.5553	866.427	53.88	YLDFSSK	[7] Label:13C(6)15N(2) (K)	P15499	Peripherin-2	2.7604e+06	2.69381e+06	2.72711e+06	0.363908
29.56_858.4132n	0	1	#387	2	29.5553	858.413	50.24	YLDFSSK		P15499	Peripherin-2	876035	915585	895810	0.177916	237.414
43.87_1383.6811n	0	1	#3890	2	43.871	1383.68	87.65	ASLDAAQYPPWR	[12] Label:13C(6)15N(4) (R)	P32958	ROM1	2.25196e+06	1.95085e+06	2.1014e+06	0.124328
43.99_1373.6747n	0	1	#19128	2	43.9923	1373.67	46.3	ASLDAAQYPPWR		P32958	ROM1	239031	202723	220877	0.0426091	75.9685	149.859	21.0466
13.20_782.3802n	1	1	#84	2	13.1989	782.38	32.84	DTEVPGR	[7] Label:13C(6)15N(4) (R)	P32958	ROM1	6.2993e+06	6.38814e+06	6.34372e+06	0.375321
13.23_772.3720n	1	1	#187	2	13.2281	772.372	34	DTEVPGR		P32958	ROM1	2.29238e+06	2.3973e+06	2.34484e+06	0.452339	267.154
34.08_1430.6564n	2	2	#107,#4742	2,3	34.0821	1430.66	87.29	YLDPSDQDVVDR	[12] Label:13C(6)15N(4) (R)	P32958	ROM1	8.61203e+06	8.30199e+06	8.45701e+06	0.500352
34.08_1420.6476n	0	2	#336,#13844	2,3	34.0821	1420.65	101.15	YLDPSDQDVVDR		P32958	ROM1	2.67928e+06	2.55691e+06	2.61809e+06	0.505052	223.749

## Sheet: Rho Het 2
mROS Rho het sample 2, 1 pmol BSA
90 min grad, 3e6, IT-100 msec, Top15, direct inject short incl list
Progenesis: sens-5, RT=0.05, charge 2-3, mouse ROS database, carb -Cys, 0 uncuts
Peptide identifier	Ions used in quantitation	Ions	Deconvoluted peptide ions	Deconvoluted charges	Retention time (min)	Neutral mass	Best identification score	Sequence	Modifications	Accession	Description	Normalized abundance (run 1)	Normalized abundance (run 2)	Average normalized abundance	Relative abundance for exclusion	Amount (fmol)	Average amount (fmol)	Rhodopsin molar ratio
32.91_1312.7230n	0	2	#644,#2323	2,3	32.9126	1312.72	64.01	HLVDEPQNLIK	[11] Label:13C(6)15N(2) (K)	P02769	BSA	2.91069e+06	2.94038e+06	2.92553e+06
32.93_1304.7094n	2	2	#183,#740	2,3	32.9331	1304.71	75.72	HLVDEPQNLIK		P02769	BSA	1.15851e+07	1.13832e+07	1.14842e+07		254.745	235.769
55.66_1488.7954n	0	2	#1743,#22829	2,3	55.6625	1488.8	112.73	LGEYGFQNALIVR	[13] Label:13C(6)15N(4) (R)	P02769	BSA	925805	837158	881482
55.69_1478.7883n	0	2	#359,#8666	2,3	55.6857	1478.79	105.76	LGEYGFQNALIVR		P02769	BSA	4.5338e+06	4.15429e+06	4.34405e+06		202.917
44.86_1170.6374n	0	1	#363	2	44.8571	1170.64	65.64	LVNELTEFAK	[10] Label:13C(6)15N(2) (K)	P02769	BSA	3.11923e+06	3.11482e+06	3.11703e+06
44.86_1162.6241n	1	1	#95	2	44.8571	1162.62	70.16	LVNELTEFAK		P02769	BSA	1.39675e+07	1.42917e+07	1.41296e+07		220.602
47.26_1021.6259n	0	1	#310	2	47.26	1021.63	56.44	QTALVELLK	[9] Label:13C(6)15N(2) (K)	P02769	BSA	2.66411e+06	2.27916e+06	2.47163e+06
47.26_1013.6125n	1	1	#61	2	47.26	1013.61	52.42	QTALVELLK		P02769	BSA	1.50594e+07	1.29591e+07	1.40093e+07		176.428
35.48_936.4950n	0	1	#431	2	35.4827	936.495	42.51	YLYEIAR	[7] Label:13C(6)15N(4) (R)	P02769	BSA	1.85222e+06	1.9623e+06	1.90726e+06
35.48_926.4867n	0	1	#141	2	35.4827	926.487	48.21	YLYEIAR		P02769	BSA	5.71731e+06	6.05046e+06	5.88388e+06		324.15
8.41_1497.7137n	2	2	#90,#541	2,3	8.40959	1497.71	88.58	EAAAQQQESATTQK	[14] Label:13C(6)15N(2) (K)	P15409	Rhodopsin	3.13744e+07	3.25953e+07	3.19848e+07
8.41_1489.7009n	2	2	#7,#111	2,3	8.40959	1489.7	97.47	EAAAQQQESATTQK		P15409	Rhodopsin	1.88951e+08	2.04387e+08	1.96669e+08		5798.78	7802.73	1
20.40_1368.6250n	1	1	#78	2	20.4011	1368.62	95.29	NPLGDDDASATASK	[14] Label:13C(6)15N(2) (K)	P15409	Rhodopsin	1.60383e+07	1.52681e+07	1.56532e+07
20.44_1360.6112n	0	1	#1404	2	20.4413	1360.61	85.39	NPLGDDDASATASK		P15409	Rhodopsin	1.65784e+08	1.59759e+08	1.62772e+08		9806.67
39.18_848.4523n	0	1	#313	2	39.184	848.452	44.05	AFLESFK	[7] Label:13C(6)15N(2) (K)	P15499	Peripherin-2	1.91801e+06	2.14363e+06	2.03082e+06	0.305484
39.23_840.4380n	1	1	#53	2	39.2274	840.438	49.91	AFLESFK		P15499	Peripherin-2	8.24807e+06	8.12363e+06	8.18585e+06	0.611066	950.34	855.261	9.12321
47.60_1245.6696n	0	2	#461	2	47.6006	1245.67	59.35	GSLESTLAYGLK	[12] Label:13C(6)15N(2) (K)	P15499	Peripherin-2	2.13864e+06	2.24608e+06	2.19236e+06	0.329784
47.60_1237.6553n	0	1	#1381	2	47.6006	1237.66	68.11	GSLESTLAYGLK		P15499	Peripherin-2	812362	788158	800260	0.0597387	86.0607
38.14_1172.5633n	0	1	#1932	2	38.1444	1172.56	67.47	ICYDALDPAK	[2] Carbamidomethyl (C)|[10] Label:13C(6)15N(2) (K)	P15499	Peripherin-2	646383	702384	674383	0.101443
38.18_1164.5487n	0	1	#743	2	38.1848	1164.55	72.91	ICYDALDPAK	[2] Carbamidomethyl (C)	P15499	Peripherin-2	1.89474e+06	2.05372e+06	1.97423e+06	0.147375	690.203
22.27_853.4430n	0	1	#2913	2	22.2704	853.443	24.81	SVPETWK	[7] Label:13C(6)15N(2) (K)	P15499	Peripherin-2	551076	578537	564807	0.0849606
22.31_845.4287n	0	1	#504	2	22.3064	845.429	37.04	SVPETWK		P15499	Peripherin-2	2.07626e+06	2.35676e+06	2.21651e+06	0.16546	925.241
30.77_866.4266n	0	1	#510	2	30.765	866.427	54.85	YLDFSSK	[7] Label:13C(6)15N(2) (K)	P15499	Peripherin-2	1.14059e+06	1.23042e+06	1.1855e+06	0.178328
30.72_858.4120n	0	1	#2748	2	30.7206	858.412	47.34	YLDFSSK		P15499	Peripherin-2	213383	224946	219165	0.0163604	43.5866
46.30_1383.6816n	0	1	#2012	2	46.3013	1383.68	75.77	ASLDAAQYPPWR	[12] Label:13C(6)15N(4) (R)	P32958	ROM1	2.25329e+06	2.3097e+06	2.2815e+06
13.44_782.3791n	1	1	#226	2	13.4428	782.379	30.3	DTEVPGR	[7] Label:13C(6)15N(4) (R)	P32958	ROM1	5.74798e+06	6.27233e+06	6.01015e+06	0.54946
13.44_772.3709n	1	1	#167	2	13.4428	772.371	32.09	DTEVPGR		P32958	ROM1	8.55008e+06	9.2098e+06	8.87994e+06	0.605997	348.346	305.956	25.5028
68.33_1402.6661n	0	1	#22482	2	68.3255	1402.67	72.87	DWFGVQWVSNR	[11] Label:13C(6)15N(4) (R)	P32958	ROM1	65751	61474.5	63612.7	0.0058156
68.36_1392.6574n	0	1	#22973	2	68.3565	1392.66	52.77	DWFGVQWVSNR		P32958	ROM1	78486.8	79911.3	79199.1	0.00540481	293.536
35.86_1430.6557n	2	2	#392,#15138	2,3	35.861	1430.66	87.62	YLDPSDQDVVDR	[12] Label:13C(6)15N(4) (R)	P32958	ROM1	4.75683e+06	4.97224e+06	4.86453e+06	0.444725
35.86_1420.6471n	0	1	#1218	2	35.861	1420.65	88.67	YLDPSDQDVVDR		P32958	ROM1	5.54953e+06	5.83908e+06	5.6943e+06	0.388598	275.985

## Sheet: Rho Het 3
mROS Rho het sample 3, 1 pmol BSA
90 min grad, 3e6, IT-100 msec, Top15, direct inject short incl list
Progenesis: sens-5, RT=0.05, charge 2-3, mouse ROS database, carb -Cys, 0 uncuts
Peptide identifier	Ions used in quantitation	Ions	Deconvoluted peptide ions	Deconvoluted charges	Retention time (min)	Neutral mass	Best identification score	Sequence	Modifications	Accession	Description	Normalized abundance (run 1)	Normalized abundance (run 2)	Average normalized abundance	Relative abundance for exclusion	Amount (fmol)	Average amount (fmol)	Rhodopsin molar ratio
32.93_1312.7230n	0	2	#226,#479	2,3	32.9301	1312.72	68.1	HLVDEPQNLIK	[11] Label:13C(6)15N(2) (K)	P02769	BSA	2.77604e+06	2.76212e+06	2.76908e+06
32.93_1304.7096n	0	2	#114,#262	2,3	32.9301	1304.71	66.95	HLVDEPQNLIK		P02769	BSA	6.4813e+06	6.35443e+06	6.41787e+06		431.465	675.386
55.59_1488.7967n	0	2	#917,#11154	2,3	55.5869	1488.8	101.21	LGEYGFQNALIVR	[13] Label:13C(6)15N(4) (R)	P02769	BSA	794707	623126	708917
55.59_1478.7886n	0	2	#1589,#17463	2,3	55.5869	1478.79	99.55	LGEYGFQNALIVR		P02769	BSA	469318	359806	414562		1710.04
44.77_1170.6372n	0	1	#165	2	44.7683	1170.64	74.16	LVNELTEFAK	[10] Label:13C(6)15N(2) (K)	P02769	BSA	3.50678e+06	3.07783e+06	3.29231e+06
44.81_1162.6244n	1	1	#46	2	44.8078	1162.62	70.73	LVNELTEFAK		P02769	BSA	9.25551e+06	8.18534e+06	8.72043e+06		377.54
47.19_1021.6261n	0	1	#153	2	47.1919	1021.63	50.51	QTALVELLK	[9] Label:13C(6)15N(2) (K)	P02769	BSA	3.18495e+06	2.55103e+06	2.86799e+06
47.19_1013.6128n	1	1	#43	2	47.1919	1013.61	39.55	QTALVELLK		P02769	BSA	8.59354e+06	6.86482e+06	7.72918e+06		371.06
35.48_936.4946n	0	1	#151	2	35.4751	936.495	39.7	YLYEIAR	[7] Label:13C(6)15N(4) (R)	P02769	BSA	1.84204e+06	2.02359e+06	1.93282e+06
35.48_926.4867n	0	1	#51	2	35.4751	926.487	42.13	YLYEIAR		P02769	BSA	3.82575e+06	4.1147e+06	3.97023e+06		486.828
8.46_1497.7148n	2	2	#22,#126	2,3	8.45841	1497.71	97.9	EAAAQQQESATTQK	[14] Label:13C(6)15N(2) (K)	P15409	Rhodopsin	6.92747e+07	6.29818e+07	6.61282e+07
8.46_1489.7015n	2	2	#21,#127	2,3	8.4615	1489.7	102.03	EAAAQQQESATTQK		P15409	Rhodopsin	7.64112e+07	6.86317e+07	7.25215e+07		2962.73	3565.34	1
20.41_1368.6250n	1	1	#14	2	20.4052	1368.63	100.69	NPLGDDDASATASK	[14] Label:13C(6)15N(2) (K)	P15409	Rhodopsin	2.92286e+07	3.0478e+07	2.98533e+07
20.41_1360.6111n	0	1	#268	2	20.4052	1360.61	102.47	NPLGDDDASATASK		P15409	Rhodopsin	4.49958e+07	4.71197e+07	4.60577e+07		4167.95
39.26_848.4525n	1	1	#102	2	39.2593	848.453	46.66	AFLESFK	[7] Label:13C(6)15N(2) (K)	P15499	Peripherin-2	2.03082e+06	1.94411e+06	1.98746e+06	0.33871
39.26_840.4382n	0	1	#137	2	39.2593	840.438	55.03	AFLESFK		P15499	Peripherin-2	1.72371e+06	1.60594e+06	1.66482e+06	0.598972	565.746	372.08	9.58217
47.58_1245.6694n	0	2	#248	2	47.5827	1245.67	63.94	GSLESTLAYGLK	[12] Label:13C(6)15N(2) (K)	P15499	Peripherin-2	1.79461e+06	1.51755e+06	1.65608e+06	0.282234
47.56_1237.6558n	0	1	#1666	2	47.5596	1237.66	47.48	GSLESTLAYGLK		P15499	Peripherin-2	227626	195108	211367	0.0760459	86.2004
38.11_1172.5630n	0	1	#650	2	38.1115	1172.56	69.51	ICYDALDPAK	[2] Carbamidomethyl (C)|[10] Label:13C(6)15N(2) (K)	P15499	Peripherin-2	658528	673813	666171	0.113531
38.16_1164.5486n	0	1	#1574	2	38.1559	1164.55	67.45	ICYDALDPAK	[2] Carbamidomethyl (C)	P15499	Peripherin-2	274157	273570	273864	0.098531	277.652
22.29_853.4429n	0	1	#1337	2	22.2906	853.443	30.95	SVPETWK	[7] Label:13C(6)15N(2) (K)	P15499	Peripherin-2	391547	372786	382166
30.71_866.4267n	0	1	#156	2	30.7135	866.427	50.22	YLDFSSK	[7] Label:13C(6)15N(2) (K)	P15499	Peripherin-2	1.5459e+06	1.57017e+06	1.55803e+06	0.265525
30.71_858.4126n	0	1	#327	2	30.7135	858.413	47.54	YLDFSSK		P15499	Peripherin-2	618314	640513	629413	0.226451	272.842
46.33_1383.6813n	0	1	#1534	2	46.3276	1383.68	75.44	ASLDAAQYPPWR	[12] Label:13C(6)15N(4) (R)	P32958	ROM1	1.35259e+06	1.26703e+06	1.30981e+06
13.43_782.3802n	1	1	#67	2	13.4317	782.38	31.28	DTEVPGR	[7] Label:13C(6)15N(4) (R)	P32958	ROM1	1.23005e+07	1.09154e+07	1.1608e+07	0.714477
13.43_772.3717n	1	1	#222	2	13.4317	772.372	33.74	DTEVPGR		P32958	ROM1	4.43066e+06	3.7669e+06	4.09878e+06	0.795854	238.48	195.777	18.2112
35.79_1430.6555n	2	2	#146	2	35.7893	1430.66	77.82	YLDPSDQDVVDR	[12] Label:13C(6)15N(4) (R)	P32958	ROM1	4.52696e+06	4.75072e+06	4.63884e+06	0.285523
35.83_1420.6477n	0	1	#538	2	35.8325	1420.65	77.81	YLDPSDQDVVDR		P32958	ROM1	1.00265e+06	1.10012e+06	1.05138e+06	0.204146	153.075

## Sheet: Compiled Molar Ratios
	WT 1	WT 2	WT 3	WT avg	WT St Dev		Rds Het 1	Rds Het 2	Rds Het 3	Rds Het avg	Rds Het St Dev		Rho Het 1	Rho Het 2	Rho Het 3	Rho Het avg	Rho Het St Dev
Rho:Peripherin-2	18.3618	17.4411	18.6765	18.1598	0.641955		30.4822	25.0954	37.1009	30.8928	6.01327		6.72824	9.12321	9.58217	8.47787	1.5325
Rho:ROM1	42.8441	41.5598	42.3188	42.2409	0.645677		27.7066	30.1504	31.7465	29.8678	2.03476		21.0466	25.5028	18.2112	21.5869	3.67571
Peripherin-2:ROM1	2.33333	2.38286	2.26589	2.32736	0.058715		0.908941	1.20143	0.855682	0.988685	0.186159		3.1281	2.79538	1.90053	2.608	0.634876
Rho:Peripherin-2/ROM1	12.8532	12.2854	12.9578	12.6988	0.361828		14.5141	13.6958	17.1078	15.1059	1.78129		5.09838	6.71944	6.27858	6.03213	0.838159
